# Supplementary material for: Experimental One-Sided Choppers Relating Neuromuscular Human Abilities to Heart Rates and Technological Evolution
Source: MDPI journal article supplement (doi:10.3390/humans3030016), 2023-08-03
Supplement: s1 [file s1]

# Supplementary Materials: Experimental One-Sided Choppers Relating Neuro-Muscular Human Abilities to Heart Rates and Technological Evolution

Igor Parra <sup>1,\*</sup>, Luisa Morales <sup>2,3</sup>, Javier Mar <sup>4,5,6</sup> and Eudald Carbonell <sup>1,7</sup>

Table S1. Values in the database containing each experimental chopper associated with its manufacturing quantified tempos, in seconds. All these data have been used for a statistical ANOVA test (see S4).

|      |      |      |      |             |      |      |
|------|------|------|------|-------------|------|------|
| xp1  | 1.15 | 2.30 | 3.50 | <b>4.70</b> | 6.20 |      |
| xp2  | 1.03 | 2.06 | 3.09 | 4.12        | 5.21 | 6.23 |
| xp3  | 1.15 | 2.30 | 3.50 | 4.70        | 5.85 | 7.00 |
| xp4  | 1.15 | 2.30 | 3.45 | 4.60        | 6.10 |      |
| xp5  | 0.90 | 1.80 | 2.70 | 3.60        | 4.28 |      |
| xp6  | 1.00 | 2.00 | 3.00 | 4.00        | 5.00 |      |
| xp7  | 1.03 | 1.98 | 2.93 | 3.88        | 4.83 | 5.86 |
| xp8  | 1.03 | 2.03 | 3.03 | 4.03        | 5.03 | 6.03 |
| xp9  | 1.00 | 2.00 | 3.00 |             |      |      |
| xp10 | 1.00 | 2.00 | 3.00 | 4.00        |      |      |
| xp11 | 1.00 | 2.00 | 3.00 | 4.00        | 5.00 |      |
| xp12 | 1.00 | 2.00 | 3.00 | 4.00        |      |      |
| xp13 | 1.00 | 2.00 | 3.00 |             |      |      |
| xp14 | 0.75 | 1.50 | 2.21 | 2.93        |      |      |
| xp15 | 0.75 | 1.50 | 2.25 | 2.93        | 3.68 | 4.43 |
| xp16 | 0.71 | 1.42 | 2.13 |             |      |      |
| xp17 | 0.68 | 1.36 | 2.04 |             |      |      |
| xp18 | 0.68 | 1.36 | 2.01 | 2.66        | 3.31 |      |
| xp19 | 0.65 | 1.30 | 1.95 |             |      |      |
| xp20 | 0.75 | 1.50 | 2.25 |             |      |      |
| xp21 | 0.71 | 1.42 | 2.13 |             |      |      |
| xp22 | 0.71 | 1.43 | 2.14 | 2.86        |      |      |
| xp23 | 0.68 | 1.36 | 2.04 |             |      |      |
| xp24 | 0.71 | 1.43 | 2.14 | 2.86        |      |      |
| xp25 | 0.68 | 1.36 | 2.04 |             |      |      |

|      |        |      |      |      |      |      |      |      |      |      |
|------|--------|------|------|------|------|------|------|------|------|------|
| xp26 | 0.65   | 1.31 | 1.97 |      |      |      |      |      |      |      |
| xp27 | 0.62   | 1.24 | 1.86 |      |      |      |      |      |      |      |
| xp28 | 0.72   | 1.44 | 2.16 |      |      |      |      |      |      |      |
| xp29 | 0.68   | 1.36 | 2.72 | 3.40 |      |      |      |      |      |      |
| xp30 | 0.68   | 1.36 | 2.72 |      |      |      |      |      |      |      |
| xp31 | 0.65   | 1.30 | 1.95 |      |      |      |      |      |      |      |
| xp32 | 0.68   | 1.36 | 2.04 |      |      |      |      |      |      |      |
| xp33 | 0.71   | 1.42 | 2.13 |      |      |      |      |      |      |      |
| xp34 | 0.75   | 1.50 | 2.25 | 3.00 | 3.75 | 4.50 | 6.00 | 6.75 |      |      |
| xp35 | 0.71   | 1.43 | 2.14 | 2.86 | 3.57 | 4.28 | 5.71 | 6.43 | 7.14 |      |
| xp36 | 0.68   | 1.36 | 2.04 | 2.72 | 3.41 | 4.09 |      |      |      |      |
| xp37 | 0.66   | 1.33 | 1.99 | 2.65 | 3.31 | 3.97 | 5.29 | 5.95 | 6.61 |      |
| xp38 | 0.65   | 1.30 | 1.96 | 2.60 | 3.26 | 3.91 |      |      |      |      |
| xp39 | 0.60   | 1.20 | 1.80 | 2.40 | 3.00 | 3.60 | 4.80 |      |      |      |
| xp40 | 0.63   | 1.25 | 1.88 | 2.50 | 3.13 | 3.75 | 5.00 | 5.63 |      |      |
| xp41 | 0.60   | 1.20 | 1.80 | 2.40 | 3.00 | 3.60 | 4.80 | 5.40 | 6.00 | 6.60 |
| xp42 | 0.87   | 1.70 | 2.60 | 3.47 | 4.35 | 5.21 | 6.93 | 7.79 | 8.64 |      |
| xp43 | 1.03   | 2.06 | 3.09 | 4.12 | 5.12 | 6.12 |      |      |      |      |
| xp44 | 0.75   | 1.50 | 2.25 | 3.00 | 3.75 | 4.50 |      |      |      |      |
| xp45 | 0.68   | 1.36 | 2.04 | 2.72 |      |      |      |      |      |      |
| xp46 | 0.71   | 1.42 | 2.13 | 2.84 |      |      |      |      |      |      |
| xp47 | 0.60   | 1.20 | 1.80 | 2.40 | 3.00 | 3.60 | 4.92 | 5.58 | 6.24 | 6.90 |
| xp48 | 0.71   | 1.42 | 2.13 | 2.48 | 3.19 |      |      |      |      |      |
| xp49 | 0.71   | 1.42 | 2.13 | 2.84 |      |      |      |      |      |      |
| xp50 | 0.65   | 1.30 | 1.95 | 2.60 | 3.25 |      |      |      |      |      |
| xp51 | 0.65   | 1.30 | 1.95 | 2.63 | 3.31 | 4.09 |      |      |      |      |
| xp52 | 0.71   | 1.42 | 2.13 | 2.81 | 3.49 | 4.17 |      |      |      |      |
| xp53 | 0.65   | 1.30 | 1.95 |      |      |      |      |      |      |      |
| xp54 | 0.63   | 1.25 | 1.87 | 2.49 | 3.11 |      |      |      |      |      |
| xp55 | 0.65   | 1.30 | 1.95 | 2.60 |      |      |      |      |      |      |
| xp56 | broken |      |      |      |      |      |      |      |      |      |
| xp57 | 0.68   | 1.36 | 2.04 |      |      |      |      |      |      |      |
| xp58 | 0.75   | 1.50 | 2.25 | 2.96 | 3.67 |      |      |      |      |      |
| xp59 | 0.83   | 1.66 | 2.49 | 3.27 | 4.05 |      |      |      |      |      |

|      |        |      |      |      |      |      |      |       |       |       |
|------|--------|------|------|------|------|------|------|-------|-------|-------|
| xp60 | 0.68   | 1.36 | 2.72 | 3.40 |      |      |      |       |       |       |
| xp61 | 0.71   | 1.42 | 2.13 | 2.84 |      |      |      |       |       |       |
| xp62 | 0.65   | 1.30 | 1.95 | 2.60 | 3.25 |      |      |       |       |       |
| xp63 | 0.65   | 1.30 | 1.95 | 2.60 |      |      |      |       |       |       |
| xp64 | 0.71   | 1.42 | 2.13 |      |      |      |      |       |       |       |
| xp65 | 0.78   | 1.56 | 2.34 | 3.12 | 3.90 | 4.68 | 5.46 |       |       |       |
| xp66 | 0.71   | 1.42 | 2.13 | 2.84 | 3.55 | 4.26 | 4.97 |       |       |       |
| xp67 | 0.78   | 1.56 | 2.34 |      |      |      |      |       |       |       |
| xp68 | broken |      |      |      |      |      |      |       |       |       |
| xp69 | broken |      |      |      |      |      |      |       |       |       |
| xp70 | 0.85   | 1.70 | 2.55 | 3.40 |      |      |      |       |       |       |
| xp71 | broken |      |      |      |      |      |      |       |       |       |
| xp72 | 0.83   | 1.66 | 2.49 |      |      |      |      |       |       |       |
| xp73 | 0.83   | 1.66 | 2.49 |      |      |      |      |       |       |       |
| xp74 | broken |      |      |      |      |      |      |       |       |       |
| xp75 | 0.83   | 1.66 | 2.49 |      |      |      |      |       |       |       |
| xp76 | broken |      |      |      |      |      |      |       |       |       |
| xp77 | 0.75   | 1.50 | 2.25 |      |      |      |      |       |       |       |
| xp78 | 0.78   | 1.56 | 2.34 | 3.12 |      |      |      |       |       |       |
| xp79 | 0.87   | 1.74 | 2.57 | 3.40 |      |      |      |       |       |       |
| xp80 | 0.75   | 1.52 | 2.27 | 3.02 |      |      |      |       |       |       |
| xp81 | 0.75   | 1.52 | 2.27 |      |      |      |      |       |       |       |
| xp82 | 0.71   | 1.42 | 2.13 |      |      |      |      |       |       |       |
| xp83 | 1.20   | 2.40 | 3.60 | 4.80 | 5.40 | 6.00 |      |       |       |       |
| xp84 | 1.20   | 1.80 | 2.40 | 3.60 |      |      |      |       |       |       |
| xp85 | 1.20   | 2.40 | 3.00 | 4.02 | 5.40 | 6.60 | 8.40 | 9.60  | 10.20 | 10.80 |
| xp86 | 1.25   | 2.50 | 3.13 | 3.75 | 4.38 | 5.00 | 7.50 |       |       |       |
| xp87 | 1.20   | 2.40 | 3.60 | 4.80 | 6.00 | 7.20 | 8.40 | 9.00  | 9.60  |       |
| xp88 | broken |      |      |      |      |      |      |       |       |       |
| xp89 | 1.20   | 2.40 | 3.60 | 4.80 | 6.00 | 7.20 | 9.60 | 10.80 | 11.40 | 12.00 |
| xp90 | broken |      |      |      |      |      |      |       |       |       |
| xp91 | 1.15   | 2.30 | 3.45 | 4.03 | 4.61 | 5.76 | 6.92 | 7.50  | 8.08  |       |
| xp92 | broken |      |      |      |      |      |      |       |       |       |
| xp93 | 1.00   | 2.00 | 2.90 | 3.80 | 4.70 | 5.60 | 7.40 | 7.85  | 8.30  |       |

|       |      |      |      |      |      |      |      |      |       |       |
|-------|------|------|------|------|------|------|------|------|-------|-------|
| xp94  | 1.00 | 2.00 | 3.00 | 4.00 | 5.00 | 6.00 | 8.00 | 9.50 | 10.00 | 10.95 |
| xp95  | 0.95 | 1.90 | 2.77 | 3.64 | 4.59 | 5.54 | 7.44 |      |       |       |
| xp96  | 0.95 | 1.90 | 2.85 | 3.35 | 3.85 | 4.60 | 6.41 | 7.31 | 8.14  | 8.97  |
| xp97  | 1.00 | 1.95 | 2.90 | 3.80 | 4.75 |      |      |      |       |       |
| xp98  | 0.90 | 1.80 | 2.63 | 3.46 | 4.29 |      |      |      |       |       |
| xp99  | 0.83 | 1.66 | 2.49 | 3.32 | 4.15 | 4.98 | 6.64 | 7.47 | 8.30  | 9.13  |
| xp100 | 0.90 | 1.80 | 2.70 | 3.53 | 3.94 | 4.84 | 6.57 | 7.40 |       |       |
| xp101 | 0.83 | 1.66 | 2.49 | 3.32 | 4.15 | 4.98 | 6.64 | 7.47 | 8.30  | 9.13  |

Drawings of experimental choppers #1 and #2 show a good morpho-technical fit with one side old choppers found at archaeological sites. These very simple one side lithic tools, both experimental and old ones, display a cutting edge used as for smashing as for cutting bones and plants.

Table S2: ANOVA test : differences in number of blows, total time, and mean time per blow based on knapper expertise.

| Expertise    |                    | Number of blows | Total time | Mean time/blow |
|--------------|--------------------|-----------------|------------|----------------|
| No expertise | Mean               | 8,06            | 8,00       | 0,98           |
|              | N                  | 16              | 16         | 16             |
|              | Standard deviation | 2,11            | 2,41       | 0,10           |
| Expert       | Mean               | 4,68            | 3,70       | 0,78           |
|              | N                  | 76              | 76         | 76             |
|              | Standard deviation | 1,84            | 1,64       | 0,14           |
| Total        | Mean               | 5,27            | 4,45       | 0,82           |
|              | N                  | 92              | 92         | 92             |
|              | Standard deviation | 2,27            | 2,42       | 0,16           |
| ANOVA        |                    | p<,001          | p<,001     | p<,001         |

Table S3: experimental sites, level of expertise of experimental knappers, hammer raw material and experimental choppers numbered as they are shown at Table SM1

|            |           |                      |                                             |                                        |
|------------|-----------|----------------------|---------------------------------------------|----------------------------------------|
| 11/14/2008 | Tarragona | Expert subject A     | 1 quartzite hammer                          | choppers 1 to 6                        |
| 3/2/2009   | Tarragona | Expert subject A     | 2 limestones hammers<br>2 quartzite hammers | choppers 7 to 15<br>choppers 16 to 24  |
| 6/3/2009   | Atapuerca | Expert subject A     | 1 limestone hammer<br>3 quartzite hammers   | choppers 25 to 57<br>choppers 58 to 82 |
| 6/4/2009   | Atapuerca | Non expert subject B | 1 quartzite hammer                          | choppers 83 to 92                      |
| 6/4/2009   | Atapuerca | Non expert subject B | 1 quartzite hammer                          | choppers 93 to 101                     |

Table S4: Values in the database containing inverse normal Gaussian distribution for HHR and experimental strikes of each one-sided chopper.

| Times      | Times      | Times      | Times      | Times      |
|------------|------------|------------|------------|------------|
| Heartbeats | Heartbeats | Heartbeats | Heartbeats | Heartbeats |
| 0.8517     | 0.8826     | 1.0383     | 0.7661     | 0.8032     |
| 0.9619     | 0.9194     | 0.8542     | 0.8028     | 0.9617     |
| 0.8404     | 0.7873     | 0.8866     | 0.8393     | 1.2        |
| 0.8088     | 1.0233     | 0.9036     | 0.7677     | 0.9146     |
| 0.8541     | 1.0414     | 0.8293     | 0.8534     | 0.7851     |
| 0.8628     | 0.9265     | 1.2693     | 0.7946     | 0.7486     |
| 1.0055     | 0.9834     | 0.8277     | 0.9714     | 0.9279     |
| 0.9832     | 1.1956     | 1.4207     | 1.0128     | 0.7789     |
| 0.8473     | 0.769      | 0.7383     | 0.7275     | 0.7347     |
| 1.0266     | 0.8044     | 0.9318     | 0.8042     | 1.0497     |
| 0.9456     | 0.7587     | 0.8147     | 0.9712     | 1.0309     |
| 0.7695     | 0.8812     | 0.8745     | 0.7282     | 1.3714     |
| 0.7305     | 0.8232     | 0.7413     | 0.8153     | 0.9631     |
| 0.9432     | 0.957      | 0.8289     | 0.8481     | 0.841      |
| 0.8705     | 0.8665     | 0.742      | 0.8009     | 1.0614     |
| 0.8507     | 1.0426     | 0.92       | 0.8935     | 0.6642     |
| 0.9274     | 1.0238     | 0.8119     | 0.8092     | 0.978      |
| 0.9809     | 0.8915     | 0.7883     | 1.1596     | 0.989      |

|        |        |        |        |        |
|--------|--------|--------|--------|--------|
| 0.7616 | 0.85   | 0.7321 | 1.0451 | 0.8944 |
| 0.7995 | 0.8721 | 0.8397 | 1.0001 | 0.7477 |
| 0.8269 | 0.7797 | 0.862  | 0.8388 | 1.0465 |
| 0.6479 | 0.8205 | 0.7242 | 0.9326 | 0.8169 |
| 0.9178 | 0.6811 | 0.8729 | 0.9647 | 1.1035 |
| 0.8831 | 0.7077 | 0.8614 | 1.1092 | 0.7568 |
| 0.9095 | 0.7948 | 0.8064 | 0.8781 | 0.9773 |
| 0.891  | 0.7726 | 0.9796 | 0.8916 | 0.7596 |
| 0.7803 | 0.9936 | 0.8371 | 0.7755 | 0.8644 |
| 0.7844 | 1.0629 | 0.7453 | 0.8878 | 0.9317 |
| 0.8421 | 0.8778 | 0.8105 | 0.8676 | 0.7357 |
| 0.7106 | 0.9814 | 0.8138 | 1.0374 | 0.9241 |
| 0.9286 | 1.2967 | 0.877  | 0.8201 | 1.0681 |
| 0.6817 | 0.8709 | 1.0223 | 0.8992 | 0.9456 |
| 0.8817 | 0.8079 | 0.9525 | 0.8507 | 1.0532 |
| 0.886  | 0.7671 | 0.6564 | 0.7207 | 0.7504 |
| 0.7635 | 0.8432 | 0.8471 | 0.9367 | 0.7015 |
| 0.9257 | 0.8013 | 0.9092 | 0.8318 | 0.9573 |
| 1.068  | 1.2486 | 0.861  | 0.8518 | 0.6451 |
| 1.0992 | 1.1148 | 0.898  | 0.7993 | 0.9436 |
| 0.904  | 0.9029 | 0.9043 | 0.6714 | 1.1712 |
| 0.936  | 1.1181 | 0.9399 | 0.9044 | 0.7778 |
| 1.0611 | 0.9922 | 0.7071 | 0.8277 | 0.8844 |
| 0.8479 | 0.8899 | 1.1083 | 0.8227 | 1.0038 |
| 0.6459 | 0.9904 | 1.1911 | 0.9188 | 0.6492 |
| 0.8765 | 1.0213 | 1.0257 | 0.8181 | 1.1864 |
| 0.8357 | 0.8312 | 0.7125 | 0.7908 | 1.2305 |
| 1.0166 | 0.7901 | 1.2419 | 0.783  | 0.8446 |
| 0.8594 | 0.8939 | 0.896  | 0.9098 | 0.9902 |
| 0.7751 | 0.8276 | 0.9311 | 0.9065 | 0.9068 |
| 1.041  | 0.7066 | 0.8227 | 0.9596 | 1.0549 |
| 1.012  | 0.7406 | 0.7149 | 0.925  | 0.8401 |
| 1.0934 | 0.7465 | 0.9343 | 1.2681 | 0.7877 |
| 0.8471 | 0.9257 | 0.835  | 0.7806 | 0.8613 |

|        |        |        |        |        |
|--------|--------|--------|--------|--------|
| 0.7242 | 0.8463 | 0.8521 | 0.8954 | 0.9971 |
| 0.8003 | 0.9036 | 0.9836 | 0.9268 | 0.8945 |
| 1.0539 | 0.7105 | 0.7011 | 0.988  | 0.807  |
| 0.7647 | 0.7511 | 0.9705 | 0.9417 | 0.8537 |
| 0.919  | 0.9465 | 0.8097 | 0.9567 | 0.7609 |
| 1.007  | 0.7407 | 1.1449 | 0.8865 | 0.703  |
| 1.5055 | 0.8403 | 0.8336 | 0.6997 | 0.8731 |
| 0.8294 | 0.9335 | 1.0647 | 0.8884 | 0.7029 |
| 1.1009 | 0.8007 | 0.921  | 0.8533 | 1.1502 |
| 0.8803 | 0.809  | 0.9534 | 0.7808 |        |
| 0.853  | 0.9333 | 1.02   | 1.184  |        |
| 0.8464 | 0.8028 | 0.8386 | 0.8989 |        |
| 0.8387 | 0.6736 | 0.9046 | 0.8633 |        |
| 0.7986 | 0.7943 | 1.013  | 0.9099 |        |
| 1.2285 | 0.9281 | 1.169  | 0.8106 |        |
| 0.6903 | 0.8904 | 0.8287 | 0.8131 |        |
| 1.0115 | 0.9351 | 1.0912 | 0.6799 |        |
| 0.8837 | 0.9387 | 0.9038 | 1.0031 |        |
| 0.8183 | 0.7808 | 1.0465 | 0.7363 |        |
| 1.0458 | 1.1761 | 0.9088 | 1.1179 |        |
| 0.8159 | 0.6592 | 0.9089 | 0.9758 |        |
| 0.8497 | 0.8126 | 0.8316 | 0.9285 |        |
| 0.786  | 0.8446 | 0.8441 | 1.0512 |        |
| 0.7245 | 1.1898 | 1.017  | 0.7441 |        |
| 1.0125 | 0.957  | 0.8307 | 0.7695 |        |
| 0.7029 | 1.0115 | 1.0545 | 0.9545 |        |
| 0.7902 | 0.8887 | 0.9836 | 0.9867 |        |
| 0.9089 | 0.7185 | 0.685  | 0.9445 |        |
| 0.8635 | 0.9323 | 0.9016 | 0.9048 |        |
| 0.8772 | 0.9412 | 0.9637 | 0.7077 |        |
| 0.8728 | 0.9821 | 0.8805 | 0.7883 |        |
| 0.6971 | 0.8084 | 0.9661 | 0.7762 |        |
| 0.9528 | 0.8393 | 0.8874 | 0.7839 |        |
| 0.8156 | 0.7188 | 1.0112 | 0.7949 |        |

|        |        |        |        |
|--------|--------|--------|--------|
| 0.943  | 0.9831 | 1.1723 | 0.9587 |
| 0.706  | 0.7158 | 0.8708 | 0.7779 |
| 0.6112 | 1.0348 | 0.6665 | 0.7318 |
| 0.7216 | 0.8963 | 1.0293 | 0.8584 |
| 0.7815 | 0.8609 | 0.7159 | 0.9202 |
| 0.8258 | 0.922  | 0.8238 | 0.7865 |
| 0.9964 | 0.8516 | 1.1611 | 0.7645 |
| 0.9073 | 1.0998 | 1.1006 | 0.7758 |
| 0.828  | 1.2657 | 0.7611 | 0.7533 |
| 0.7962 | 1.0461 | 0.7591 | 0.8881 |
| 0.6267 | 1.0393 | 0.8054 | 0.8313 |
| 0.7899 | 0.7424 | 0.8596 | 0.836  |
| 0.7771 | 0.9551 | 0.8496 | 0.8174 |
| 0.8294 | 0.9619 | 1.0496 | 0.7994 |
| 0.9245 | 0.8919 | 0.7473 | 0.8772 |
| 1.019  | 0.9251 | 0.7815 | 1.0465 |
| 0.834  | 1.1073 | 0.9259 | 0.9096 |
| 0.9619 | 0.8688 | 0.8557 | 0.8713 |
| 0.9703 | 0.9656 | 0.95   | 0.8947 |
| 0.8279 | 0.983  | 1.0751 | 1.2365 |

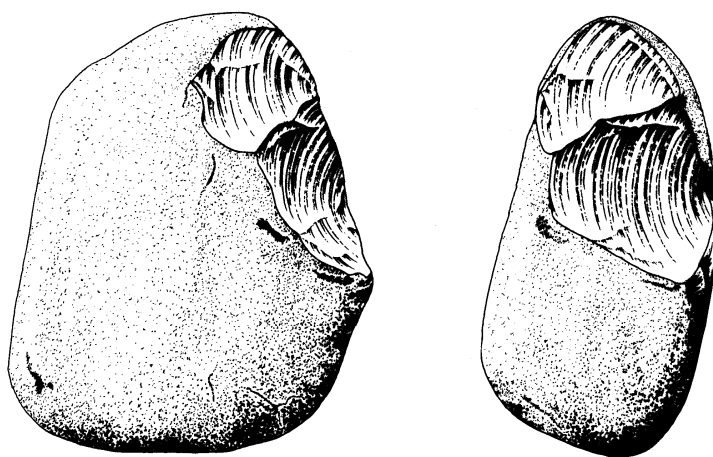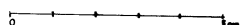

Figure S1 experimental chopper 1

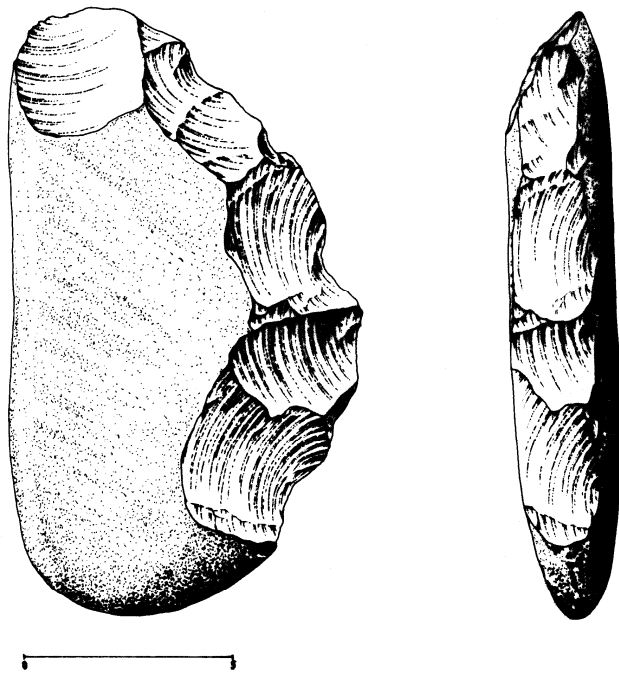

Figure S2 experimental chopper 2
